# Supplementary material
Source: PubMed Central journal article supplement (PMC3557558)
Supplement: NIHMS423956-supplement-Supp_TableS1_FigureS1.pdf [file NIHMS423956-supplement-Supp_TableS1_FigureS1.pdf]

**SUPPLEMENTARY MATERIAL FOR:**

**Novel crosstalk between ERK MAPK and p38 MAPK leads to homocysteine-NMDA  
receptor mediated neuronal cell death**

Ranjana Poddar\*<sup>¶</sup> and Surojit Paul\*

\*University of New Mexico Health Sciences Center, Department of Neurology, 1, University  
of New Mexico, Albuquerque, NM – 87131

<sup>¶</sup>Corresponding Author:  
Ranjana Poddar, PhD  
University of New Mexico Health Sciences Center,  
Department of Neurology,  
1, University of New Mexico,  
Albuquerque, NM – 87131  
Tel: (505) 272-5859  
Fax: (505) 272-8306  
e-mail: rpoddar@salud.unm.edu

| <b>Pharmacological inhibitors</b> | <b>Physiological action</b>                                                      | <b>Source</b>                 | <b>Concentration used</b>                                               |
|-----------------------------------|----------------------------------------------------------------------------------|-------------------------------|-------------------------------------------------------------------------|
| <b>SB203580</b>                   | selective ATP-competitive inhibitor of p38 MAPK                                  | EMD Millipore, Billerica, USA | 5 $\mu$ M (Davies et al. 2000; Poddar et. al. 2010)                     |
| <b>SB202190</b>                   | selective ATP-competitive inhibitor of $\alpha$ and $\beta$ isoforms of p38 MAPK | EMD Millipore, Billerica, USA | 7.5 $\mu$ M (Davies et al. 2000)                                        |
| <b>SB239063</b>                   | selective ATP-competitive inhibitor of $\alpha$ and $\beta$ isoforms of p38 MAPK | EMD Millipore Billerica, USA  | 10 $\mu$ M (legos et al. 2002)                                          |
| <b>PD98059</b>                    | selective inhibitor of the activation of MEK1/2 (upstream kinase of ERK1/2)      | EMD Millipore Billerica, USA  | 15 $\mu$ M (Alessi et. al. 1995; Poddar and Paul. 2009)                 |
| <b>U0126</b>                      | selective non-competitive inhibitor of MEK1/2 (upstream kinase of ERK1/2)        | EMD Millipore Billerica, USA  | 20 $\mu$ M (Favata et.al. 1998; Davies et al. 2000 Stanciu et.al. 2002) |
| <b>FR180204</b>                   | selective ATP-competitive inhibitor of ERK1 and ERK2                             | EMD Millipore Billerica, USA  | 4 $\mu$ M (Ohori et. al. 2005)                                          |
| <b>MK801</b>                      | selective non-competitive NMDA receptor antagonist                               | Sigma Aldrich, St Louis, USA  | 5 $\mu$ M (Yun et. al. 1998; Poddar and Paul. 2009)                     |
| <b>APV</b>                        | selective competitive NMDA receptor antagonist                                   | Sigma Aldrich, St Louis, USA  | 200 $\mu$ M (Paul et. al. 2003; Poddar and Paul. 2009)                  |

**Table S1.** Summary of all pharmacological inhibitors used in the study, their physiological action and sources.

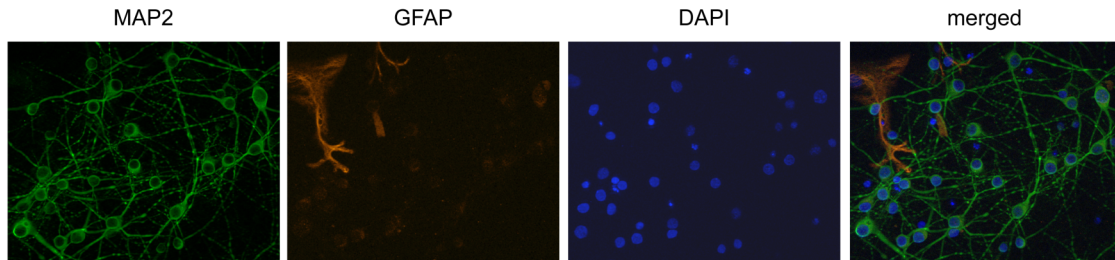

**Figure S1.** Purity of primary neuronal cultures. Neuronal cultures were processed for immunocytochemical staining with anti-MAP-2 (neuronal marker, green) and anti-GFAP (astrocyte marker, red) antibodies and counterstained with DAPI (blue). Quantitative analysis (1500 cells from 3 experiments) showed that  $95.63 \pm 0.67\%$  ( $p < 0.0001$ ) of the cells stained for anti-MAP-2 antibody indicating that  $\sim 95\%$  of the cells are neurons.
